# Supplementary material
Source: HighWire-hosted journal article supplement (https://www.annfammed.org/highwire/filestream/13819/field_highwire_adjunct_files/0/Phillips_Supp_Table.pdf)
Supplement: Phillips_Supp_Table.pdf [file Phillips_Supp_Table.pdf]

## Supplemental materials for

Phillips, Jr R. The need for coaches in the clinical world. *Ann Fam Med.* 2021;19(3):194-195.

**Supplemental Table 1. TRADEMaRQ Measures across Participating Health Systems**

| CMS eMeasure ID | NQF # | Measure Title                                                                                                                                                    | KPWA | KPCO | OCHIN | SETMA |
|-----------------|-------|------------------------------------------------------------------------------------------------------------------------------------------------------------------|------|------|-------|-------|
| CMS165v2        | 18    | Controlling High Blood Pressure                                                                                                                                  | X    | X    | X     | X     |
| CMS138v2        | 28    | Smoking Cessation Counseling                                                                                                                                     |      | X    | X     |       |
| CMS125v2        | 31    | Breast Cancer Screening                                                                                                                                          | X    | X    | X     | X     |
| CMS124v2        | 32    | Cervical Cancer Screening                                                                                                                                        | X    | X    | X     | X     |
| CMS130v2        | 34    | Colorectal Cancer Screening                                                                                                                                      | X    | X    | X     | X     |
| CMS147v2        | 41    | Preventive Care and Screening: Influenza Immunization                                                                                                            |      |      | X     | X     |
| CMS127v2        | 43    | Pneumonia Vaccination Status for Older Adults                                                                                                                    |      |      | X     | X     |
| CMS131v2        | 55    | Diabetes: Eye Exam                                                                                                                                               | X    | X    | X     | X     |
| CMS123v2        | 56    | Diabetes: Foot Exam                                                                                                                                              |      | X    | X     | X     |
| CMS122v2        | 59    | Diabetes: Hemoglobin A1c Poor Control                                                                                                                            |      | X    | X     | X     |
| CMS134v2        | 62    | Diabetes: Urine Protein Screening                                                                                                                                | X    |      | X     | X     |
| CMS163v2        | 64    | Diabetes: Low Density Lipoprotein (LDL) Management                                                                                                               |      |      | X     | X     |
| CMS164v2        | 68    | Ischemic Vascular Disease (IVD): Use of Aspirin or Another Antithrombotic                                                                                        |      | X    | X     |       |
| CMS145v2        | 70    | Coronary Artery Disease (CAD): Beta-Blocker Therapy—Prior Myocardial Infarction (MI) or Left Ventricular Systolic Dysfunction (LVEF <40%)                        | X    |      | X     |       |
| CMS182v3        | 75    | Ischemic Vascular Disease (IVD): Complete Lipid Panel and LDL Control                                                                                            |      | X    | X     |       |
| CMS135v2        | 81    | Heart Failure (HF): Angiotensin-Converting Enzyme (ACE) Inhibitor or Angiotensin Receptor Blocker (ARB) Therapy for Left Ventricular Systolic Dysfunction (LVSD) | X    | X    | X     |       |
| CMS144v2        | 83    | Heart Failure (HF): Beta-Blocker Therapy for Left Ventricular Systolic Dysfunction (LVSD)                                                                        |      |      | X     |       |
| CMS2v3          | 418   | Preventive Care and Screening: Screening for Clinical Depression and Follow-Up Plan                                                                              |      |      | X     |       |
| CMS68v3         | 419   | Documentation of Current Medications in the Medical Record                                                                                                       |      |      | X     | X     |

CMS = Center for Medicare & Medicaid Services; NQF = National Quality Forum; KPWA = Kaiser Permanente Washington; KPCO = Kaiser Permanente Colorado; SETMA = Southeast Texas Medical Associates; OCHIN = OCHIN is a nonprofit health care innovation center focused on the needs of community health centers, small practices and critical access hospitals
